# Supplementary material
Source: PubMed Central journal article supplement (PMC3172833)
Supplement: psb0605_0665SD1.pdf [file psb0605_0665SD1.pdf]

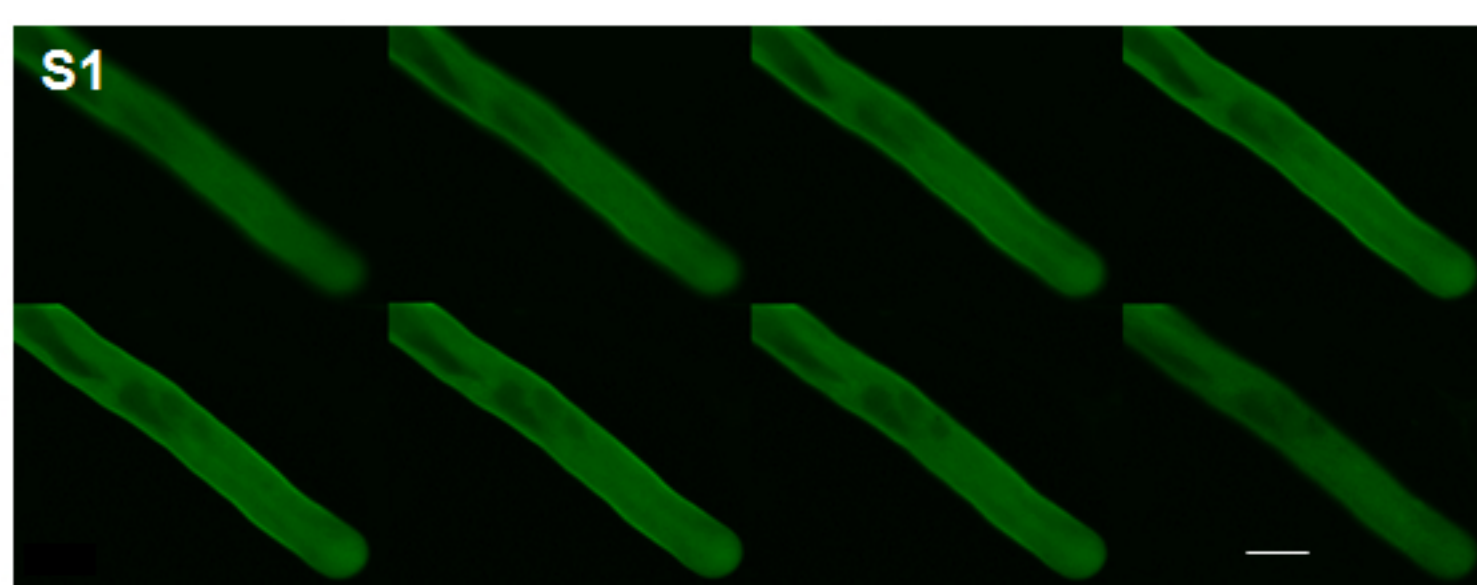

### Supplementary Figure 1

Z-stack series of a growing *N. tabacum* tobacco pollen tube showing the subcellular localization of GFP-SYP125 at different planes (observation made ~6 h after transformation). Each section is ~2 $\mu$ m thick. Scale bar = 10  $\mu$ m.

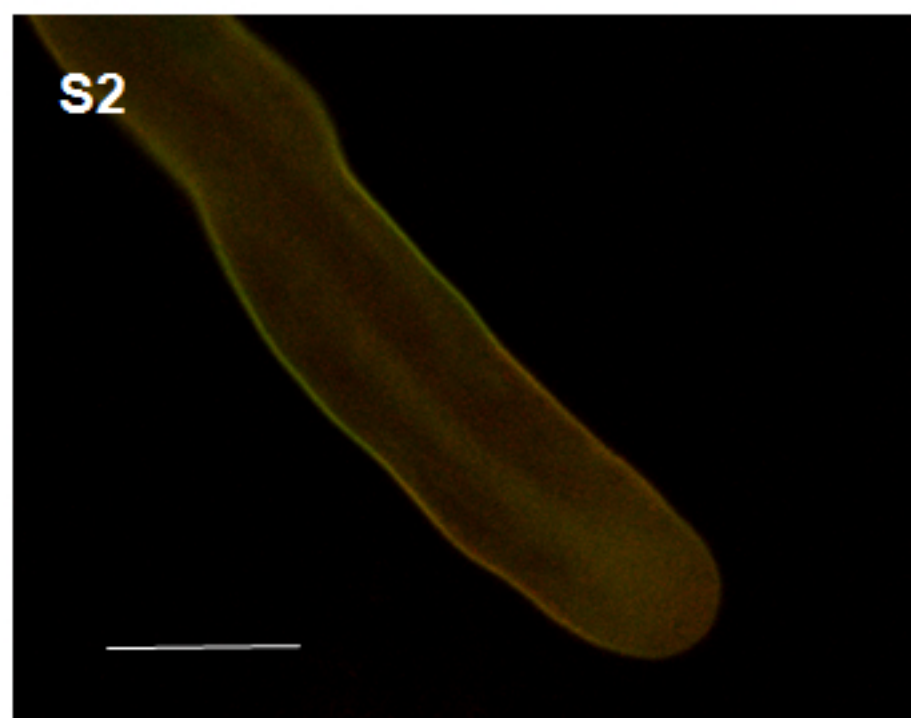

### Supplementary Figure 2

Growing *N. tabacum* tobacco pollen tube co-expressing GFP-SYP125 (green) and RFP-SYP124 (red). At the apical inverted cone and at the sub-apical plasma membrane the two signals overlap (observation made ~6 h after transformation). Scale bar = 10  $\mu$ m.
